# Supplementary material for: Presence of myxoid stromal change and fibrotic focus in pathological examination are prognostic factors of triple-negative breast cancer: Results from a retrospective single-center study
Source: PubMed Central journal article supplement (PMC7877644; doi:10.1371/journal.pone.0245725), 2021-02-11
Supplement: pone.0245725.s001.pdf [file pone.0245725.s001.pdf]

| No. | Age | menopausal status | BMI  | pathological maximum invasive component (mm) | positive lymph nodes | pTNM      | pStage | histological grading | ly | v | Stromal TILs | KI-67(Operatn: %) | Adjuvant chemotherapy | Fibrotic focus | Myxoid change (Operatn) | Myxoid change (CNB) | relapse       | RF5 (months)  | dead | OS(months) |    |
|-----|-----|-------------------|------|----------------------------------------------|----------------------|-----------|--------|----------------------|----|---|--------------|-------------------|-----------------------|----------------|-------------------------|---------------------|---------------|---------------|------|------------|----|
| 5   | 75  | -                 | 22.1 | 15                                           | 0                    | T1cN0M0   | I      | 3                    | +  | - | -            | 40                | +                     | -              | +                       | -                   | -             | 20            | -    | 20         |    |
| 7   | 31  | +                 | 27   | 12                                           | 0                    | T1cN0M0   | I      | 3                    | -  | - | -            | 70                | +                     | -              | -                       | -                   | -             | 20            | -    | 20         |    |
| 15  | 43  | +                 | 31.2 | 20                                           | 0                    | T1cN0M0   | I      | 3                    | -  | - | -            | 40                | +                     | +              | -                       | -                   | -             | 25            | -    | 35         |    |
| 16  | 68  | -                 | 32.2 | 18                                           | 0                    | T1cN0M0   | I      | 3                    | -  | - | +            | 70                | +                     | -              | -                       | -                   | -             | 36            | -    | 36         |    |
| 21  | 66  | -                 | 21.8 | 22                                           | 0                    | T2N0M0    | IIA    | 2                    | +  | - | -            | 20                | +                     | -              | -                       | -                   | -             | 31            | -    | 31         |    |
| 42  | 83  | -                 | 23   | 18                                           | 2                    | T1cN1M0   | IIA    | 3                    | -  | - | -            | 70                | -                     | -              | -                       | -                   | -             | 18            | -    | 18         |    |
| 44  | 76  | -                 | 26   | 18                                           | 0                    | T1cN0M0   | I      | 2                    | -  | - | +            | 40                | -                     | -              | -                       | +                   | -             | 40            | -    | 40         |    |
| 57  | 77  | -                 | 36.8 | 6                                            | 0                    | T1bN0M0   | I      | 1                    | -  | - | -            | 15                | +                     | -              | -                       | -                   | -             | 34            | +    | 34         |    |
| 59  | 65  | -                 | 23.3 | 10                                           | 2                    | T1bN1M0   | IIA    | 2                    | +  | - | +            | 25                | +                     | -              | -                       | +                   | -             | 53            | -    | 53         |    |
| 62  | 77  | -                 | 28.9 | 51                                           | 0                    | T3N0M0    | IIIB   | 3                    | +  | + | -            | 80                | -                     | -              | -                       | +                   | -             | 11            | -    | 23         |    |
| 63  | 68  | -                 | 24.7 | 20                                           | 0                    | T1cN0M0   | I      | 2                    | +  | - | -            | 45                | -                     | -              | -                       | -                   | -             | 60            | -    | 60         |    |
| 65  | 60  | -                 | 27.6 | 28                                           | 0                    | T2N0M0    | IIA    | 2                    | +  | - | +            | 35                | -                     | -              | -                       | +                   | -             | 60            | -    | 60         |    |
| 66  | 74  | +                 | 21.7 | 35                                           | 9                    | T2N2M0    | IIA    | 2                    | +  | + | +            | 50                | -                     | -              | -                       | -                   | -             | 18            | +    | 36         |    |
| 67  | 54  | -                 | 21.1 | 22                                           | 0                    | T2N0M0    | IIA    | 2                    | +  | + | -            | 15                | +                     | -              | +                       | -                   | -             | 60            | -    | 60         |    |
| 70  | 80  | -                 | 20.4 | 12                                           | 0                    | T1bN0M0   | I      | 2                    | +  | + | -            | 20                | -                     | -              | -                       | +                   | -             | 60            | -    | 60         |    |
| 72  | 93  | -                 | 16.2 | 25                                           | 2                    | T2N1M0    | IIIB   | 2                    | +  | + | -            | 40                | -                     | -              | -                       | +                   | -             | 60            | -    | 60         |    |
| 73  | 60  | -                 | 25.5 | 42                                           | 0                    | T2N0M0    | IIA    | 2                    | +  | + | +            | 80                | +                     | -              | -                       | -                   | -             | 60            | -    | 60         |    |
| 76  | 87  | -                 | 23.5 | 55                                           | not tested           | T1a-cN0M0 | IIIB   | 3                    | +  | + | -            | 40                | -                     | -              | -                       | +                   | -             | 22            | +    | 29         |    |
| 79  | 73  | -                 | 27.4 | 38                                           | 0                    | T2N0M0    | IIA    | 3                    | +  | + | -            | 55                | -                     | unknown        | +                       | -                   | -             | 44            | -    | 44         |    |
| 81  | 84  | -                 | 24.7 | 40                                           | 0                    | T2N0M0    | IIA    | 3                    | +  | + | -            | 80                | -                     | -              | -                       | +                   | -             | 33            | -    | 60         |    |
| 85  | 45  | unknown           | 28.9 | 20                                           | 0                    | T1cN0M0   | I      | 3                    | +  | - | -            | 70                | +                     | -              | -                       | -                   | not available | 11            | -    | 11         |    |
| 86  | 67  | -                 | 19.9 | 20                                           | 0                    | T1cN0M0   | I      | 3                    | +  | + | -            | 50                | -                     | -              | -                       | +                   | -             | 60            | -    | 60         |    |
| 87  | 71  | -                 | 20.9 | 16                                           | 1                    | T1cN1M0   | IIA    | 2                    | +  | - | -            | 70                | -                     | -              | -                       | -                   | -             | 9             | +    | 18         |    |
| 88  | 70  | -                 | 23.7 | 12                                           | 0                    | T1cN0M0   | I      | 2                    | +  | - | +            | 28                | -                     | -              | -                       | -                   | -             | 60            | -    | 60         |    |
| 89  | 60  | -                 | 26.5 | 13                                           | not tested           | T1c-cN0M0 | I      | 2                    | +  | - | -            | 80                | -                     | +              | +                       | -                   | -             | 60            | -    | 60         |    |
| 90  | 88  | -                 | 21.1 | 40                                           | 2                    | T2N1M0    | IIIB   | 2                    | +  | + | -            | 50                | -                     | +              | +                       | -                   | -             | 22            | -    | 23         |    |
| 91  | 58  | -                 | 21.3 | 20                                           | not tested           | T1c-cN0M0 | I      | 3                    | +  | + | +            | 50                | +                     | -              | -                       | -                   | -             | 60            | -    | 60         |    |
| 93  | 44  | +                 | 19.8 | 27                                           | 3                    | T2N1M0    | IIIB   | 3                    | +  | + | -            | 47                | +                     | -              | -                       | +                   | -             | 50            | -    | 50         |    |
| 94  | 69  | -                 | 17.3 | 54                                           | 0                    | T4bN0M0   | IIIB   | 2                    | +  | + | -            | 40                | -                     | unknown        | -                       | -                   | -             | 60            | -    | 60         |    |
| 97  | 70  | -                 | 26.7 | 10                                           | 0                    | T1bN0M0   | I      | 1                    | -  | - | -            | 25                | -                     | -              | -                       | -                   | -             | 60            | -    | 60         |    |
| 99  | 37  | +                 | 17.9 | 52                                           | 2                    | T3N1M0    | IIIA   | 3                    | +  | + | -            | 80                | +                     | +              | +                       | -                   | -             | 9             | +    | 16         |    |
| 100 | 80  | -                 | 22.6 | 21                                           | 0                    | T2N0M0    | IIA    | 3                    | +  | + | -            | 80                | +                     | +              | +                       | -                   | -             | 60            | -    | 60         |    |
| 102 | 61  | -                 | 25   | 40                                           | 5                    | T2N0M0    | IIIA   | 3                    | +  | + | -            | 25                | -                     | -              | -                       | -                   | -             | 48            | -    | 60         |    |
| 103 | 37  | +                 | 23.5 | 30                                           | 0                    | T2N0M0    | IIA    | 3                    | +  | + | -            | 40                | +                     | -              | -                       | -                   | -             | 52            | -    | 52         |    |
| 110 | 74  | -                 | 19.1 | 25                                           | 0                    | T2N0M0    | IIA    | 2                    | +  | + | +            | 40                | +                     | -              | -                       | -                   | -             | 60            | -    | 60         |    |
| 111 | 78  | -                 | 25.7 | 40                                           | 3                    | T2N1M0    | IIIB   | 3                    | +  | + | -            | 49                | +                     | +              | +                       | -                   | -             | 60            | -    | 60         |    |
| 118 | 89  | -                 | 20.2 | 35                                           | not tested           | T2-cN0M0  | IIA    | 3                    | +  | + | -            | 5                 | -                     | +              | +                       | +                   | -             | 46            | -    | 46         |    |
| 119 | 67  | -                 | 27.1 | 7                                            | not tested           | T1b-cN0M0 | I      | 2                    | -  | - | -            | 60                | -                     | -              | -                       | -                   | -             | 60            | -    | 60         |    |
| 126 | 60  | -                 | 22.5 | 6                                            | not tested           | T1b-cN0M0 | I      | 2                    | -  | - | -            | -                 | -                     | -              | -                       | -                   | -             | 60            | -    | 60         |    |
| 127 | 55  | -                 | 27.3 | 50                                           | 0                    | T2N0M0    | IIA    | 3                    | +  | + | -            | 15                | -                     | unknown        | +                       | +                   | -             | 60            | -    | 60         |    |
| 129 | 44  | +                 | 21   | 30                                           | not tested           | T2-cN0M0  | IIA    | 3                    | +  | + | +            | 30                | +                     | -              | -                       | -                   | -             | 60            | -    | 60         |    |
| 131 | 36  | +                 | 19.5 | 13                                           | 0                    | T1cN0M0   | I      | 2                    | +  | - | -            | 70                | +                     | -              | -                       | -                   | -             | 60            | -    | 60         |    |
| 138 | 62  | -                 | 20.2 | 26                                           | 0                    | T2N0M0    | IIA    | 2                    | +  | + | +            | 10                | -                     | -              | -                       | -                   | -             | 60            | -    | 60         |    |
| 140 | 67  | -                 | 18.8 | 25                                           | 0                    | T2N0M0    | IIA    | 2                    | +  | + | -            | 10                | -                     | -              | -                       | -                   | -             | 60            | -    | 60         |    |
| 141 | 81  | -                 | 22.8 | 18                                           | 2                    | T1cN1M0   | IIA    | 2                    | +  | + | -            | 15                | +                     | +              | -                       | -                   | -             | 60            | -    | 60         |    |
| 143 | 82  | -                 | 18.3 | 12                                           | not tested           | T1c-cN0M0 | I      | 3                    | +  | + | -            | 30                | -                     | -              | +                       | -                   | not available | 31            | -    | 31         |    |
| 144 | 74  | -                 | 25.3 | 23                                           | not tested           | T2-cN0M0  | IIA    | 2                    | +  | - | -            | 70                | -                     | +              | -                       | -                   | -             | 60            | -    | 60         |    |
| 145 | 62  | -                 | 31.3 | 2                                            | not tested           | T1a-cN0M0 | I      | 2                    | -  | - | +            | -                 | -                     | -              | -                       | -                   | -             | 60            | -    | 60         |    |
| 147 | 80  | -                 | 23.1 | 40                                           | 1                    | T4bN1M0   | IIIB   | 3                    | +  | + | -            | 30                | -                     | -              | -                       | -                   | -             | not available | 56   | +          | 56 |
| 148 | 64  | -                 | 25.2 | 35                                           | 4                    | T2N2M0    | IIIA   | 2                    | +  | + | -            | 15                | +                     | +              | +                       | -                   | -             | 40            | -    | 60         |    |
| 149 | 69  | -                 | 27.8 | 25                                           | 0                    | T2N0M0    | IIA    | 3                    | +  | + | +            | 25                | +                     | -              | -                       | -                   | -             | not available | 60   | -          | 60 |
| 151 | 79  | -                 | 23.4 | 22                                           | not tested           | T2-cN0M0  | IIA    | 3                    | +  | + | -            | 50                | -                     | +              | +                       | -                   | -             | 60            | +    | 60         |    |
| 152 | 54  | -                 | 27.3 | 18                                           | 0                    | T1cN0M0   | I      | 3                    | +  | + | -            | 60                | +                     | +              | +                       | -                   | -             | 60            | -    | 60         |    |
| 153 | 58  | -                 | 21.9 | 20                                           | not tested           | T1c-cN0M0 | I      | 3                    | +  | + | -            | 15                | +                     | +              | +                       | -                   | -             | not available | 35   | +          | 42 |
| 156 | 50  | -                 | 22.5 | 20                                           | 15                   | T1cN3M0   | IIIC   | 3                    | +  | + | +            | 70                | -                     | -              | -                       | -                   | -             | not available | 11   | +          | 41 |
| 157 | 41  | +                 | 20.6 | 17                                           | not tested           | T1c-cN0M0 | I      | 3                    | +  | + | +            | 60                | -                     | -              | -                       | -                   | -             | not available | 60   | -          | 60 |
| 159 | 58  | -                 | 24   | 2                                            | 0                    | T1aN0M0   | I      | 3                    | +  | + | +            | -                 | +                     | -              | -                       | -                   | -             | not available | 48   | -          | 48 |
| 161 | 52  | -                 | 24   | 20                                           | 0                    | T1cN0M0   | I      | 3                    | +  | + | +            | 80                | +                     | -              | -                       | -                   | -             | not available | 60   | -          | 60 |
| 162 | 45  | +                 | 18.5 | 25                                           | 0                    | T2N0M0    | IIA    | 3                    | +  | + | -            | -                 | -                     | -              | +                       | -                   | -             | not available | 15   | +          | 67 |
| 163 | 71  | -                 | 20.4 | 12                                           | not tested           | T1c-cN0M0 | I      | 2                    | +  | - | -            | 60                | -                     | -              | -                       | -                   | -             | not available | 53   | -          | 53 |
| 165 | 69  | -                 | 26.5 | 7                                            | not tested           | T1b-cN0M0 | I      | 2                    | +  | - | -            | 80                | -                     | -              | -                       | -                   | -             | not available | 60   | -          | 60 |
| 168 | 81  | -                 | 19.6 | 40                                           | 0                    | T2N0M0    | IIA    | 2                    | -  | - | +            | 15                | -                     | -              | -                       | -                   | -             | not available | 16   | -          | 16 |
